# Supplementary material
Source: PubMed Central journal article supplement (PMC6275970)
Supplement: 11658_2010_17_MOESM1_ESM.pdf [file 11658_2010_17_MOESM1_ESM.pdf]

**Supplement 1. Marker expression analysis of cells from human amniotic fluid.**

Cells were obtained from amniocentesis samples, cultured as described in the text, and incubated with FITC- or PE -labeled antibodies. Values are mean  $\pm$  s.e.m. for four independent human amniotic fluid samples.

| Marker       | Cell type | Percentage positive |
|--------------|-----------|---------------------|
| CD10         | AF-type   | 0.97 $\pm$ 0.13     |
|              | F-type    | 0.16 $\pm$ 0.11     |
| CD14         | AF-type   | 0.93 $\pm$ 0.27     |
|              | F-type    | 0.97 $\pm$ 0.19     |
| CD34         | AF-type   | 0.93 $\pm$ 0.24     |
|              | F-type    | 1.15 $\pm$ 0.25     |
| CD44         | AF-type   | 97.70 $\pm$ 3.57    |
|              | F-type    | 98.74 $\pm$ 4.12    |
| CD45         | AF-type   | 0.65 $\pm$ 0.17     |
|              | F-type    | 0.94 $\pm$ 0.27     |
| CD90         | AF-type   | 96.65 $\pm$ 4.56    |
|              | F-type    | 97.61 $\pm$ 3.37    |
| CD105        | AF-type   | 2.88 $\pm$ 0.74     |
|              | F-type    | 96.11 $\pm$ 4.73    |
| CD117        | AF-type   | 12.92 $\pm$ 2.78    |
|              | F-type    | 37.40 $\pm$ 1.76    |
| HLA-A,B,C    | AF-type   | 98.74 $\pm$ 2.33    |
|              | F-type    | 98.33 $\pm$ 4.27    |
| HLA-DR,DP,DQ | AF-type   | 0.94 $\pm$ 0.21     |
|              | F-type    | 1.61 $\pm$ 0.61     |
